# Supplementary material
Source: Springer Nature journal article supplement (https://www.springermedizin.de/resource/supplementary/12939_2013_363_MOESM3_ESM.pdf/9550988)

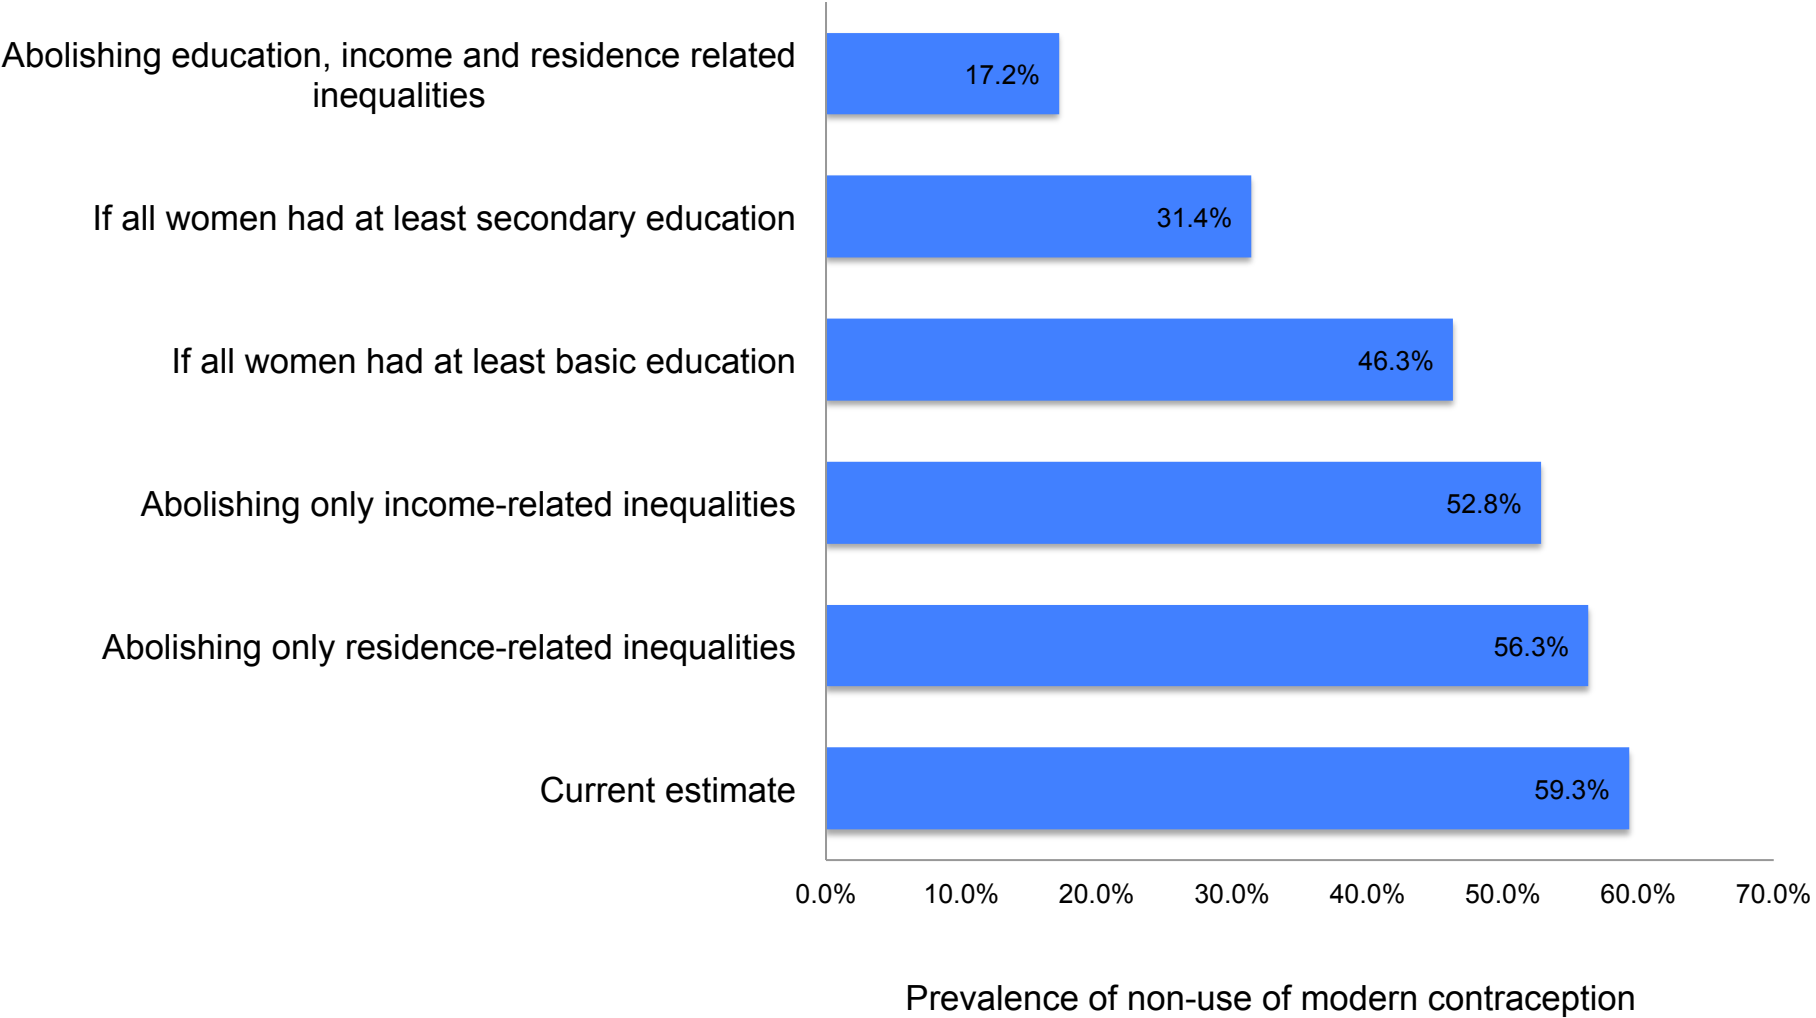

Supplement: MOESM3 [file 9550988]
